# Supplementary material for: Human iPSC-Derived Neurons and Cerebral Organoids Establish Differential Effects of Germline NF1 Gene Mutations
Source: PubMed Central journal article supplement — Stem Cell Reports. 2020 Apr 2;14(4):541–50. doi: 10.1016/j.stemcr.2020.03.007 (PMC7160375; doi:10.1016/j.stemcr.2020.03.007), 2020-04-02
Supplement: mmc1.pdf [file mmc1.pdf]

**Stem Cell Reports, Volume 14**

**Supplemental Information**

**Human iPSC-Derived Neurons and Cerebral Organoids Establish Differential Effects of Germline *NF1* Gene Mutations**

**Corina Anastasaki, Michelle L. Wegscheid, Kelly Hartigan, Jason B. Papke, Nathan D. Kopp, Jiayang Chen, Olivia Cobb, Joseph D. Dougherty, and David H. Gutmann**

## Supplementary Figures

**Figure S1.** Isogenic *NF1*-mutant hiPSC sequencing and allele expression analysis of isogenic and patient-derived *NF1*-mutant hiPSCs.

**Figure S2.** Analysis of isogenic hiPSCs, NPCs, and cerebral organoids.

**Figure S3.** Comparisons between isogenic and patient-derived *NF1*-mutant hiPSC-NPCs.

**Figure S4.** Comparisons between isogenic and patient-derived *NF1*-mutant hiPSC-organoids.

**Table S1.** Inter-clone analysis of control and *NF1*-mutant hiPSC-derived cells and organoids.

**Table S2.** Primary antibodies used.

## Supplementary Methods

**Figure S1. Isogenic *NF1*-mutant hiPSC sequencing and allele expression analysis of isogenic and patient-derived *NF1*-mutant hiPSCs.**

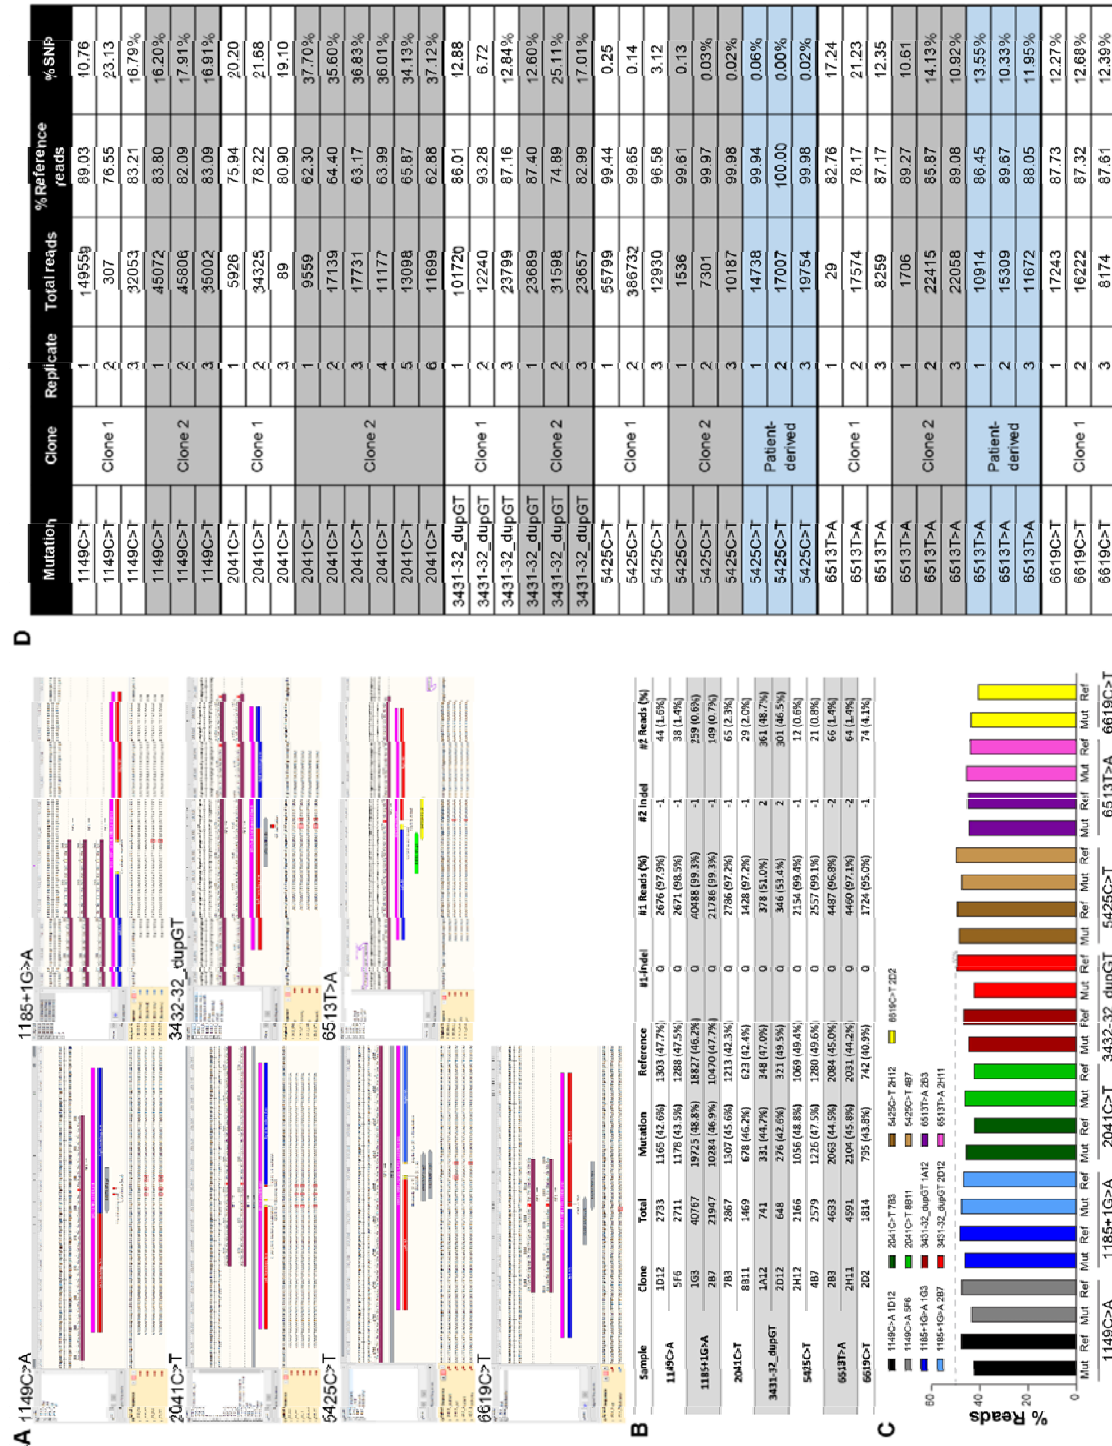

**D**

| Mutation      | Clone           | Replicate | Total reads | % Reference reads | % SNPs |
|---------------|-----------------|-----------|-------------|-------------------|--------|
| 1149C>T       | Clone 1         | 1         | 149559      | 89.03             | 10.76  |
| 1149C>T       |                 | 2         | 307         | 76.55             | 23.13  |
| 1149C>T       |                 | 3         | 32053       | 83.21             | 16.79% |
| 1149C>T       | Clone 2         | 1         | 46072       | 83.80             | 16.20% |
| 1149C>T       |                 | 2         | 45806       | 82.09             | 17.91% |
| 1149C>T       |                 | 3         | 36002       | 85.09             | 16.91% |
| 2041C>T       | Clone 1         | 1         | 5926        | 75.94             | 20.20  |
| 2041C>T       |                 | 2         | 34325       | 76.22             | 21.68  |
| 2041C>T       |                 | 3         | 89          | 80.90             | 19.10  |
| 2041C>T       | Clone 2         | 1         | 9559        | 62.30             | 37.70% |
| 2041C>T       |                 | 2         | 17139       | 64.40             | 35.60% |
| 2041C>T       |                 | 3         | 17731       | 63.17             | 36.83% |
| 2041C>T       | Clone 2         | 4         | 11177       | 63.99             | 36.01% |
| 2041C>T       |                 | 5         | 13098       | 65.87             | 34.13% |
| 2041C>T       |                 | 6         | 11699       | 62.88             | 37.12% |
| 3431-32_dupGT | Clone 1         | 1         | 101720      | 86.01             | 12.88  |
| 3431-32_dupGT |                 | 2         | 12240       | 93.28             | 6.72   |
| 3431-32_dupGT |                 | 3         | 23799       | 87.16             | 12.84% |
| 3431-32_dupGT | Clone 2         | 1         | 23689       | 87.40             | 12.60% |
| 3431-32_dupGT |                 | 2         | 31598       | 74.89             | 25.11% |
| 3431-32_dupGT |                 | 3         | 23657       | 82.99             | 17.01% |
| 5425C>T       | Clone 1         | 1         | 55799       | 99.44             | 0.25   |
| 5425C>T       |                 | 2         | 366732      | 99.65             | 0.14   |
| 5425C>T       |                 | 3         | 12930       | 96.58             | 3.12   |
| 5425C>T       | Clone 2         | 1         | 1536        | 99.61             | 0.13   |
| 5425C>T       |                 | 2         | 7301        | 99.97             | 0.03%  |
| 5425C>T       |                 | 3         | 10187       | 99.98             | 0.02%  |
| 5425C>T       | Patient-derived | 1         | 14738       | 99.94             | 0.06%  |
| 5425C>T       |                 | 2         | 17007       | 100.00            | 0.00%  |
| 5425C>T       |                 | 3         | 19754       | 99.98             | 0.02%  |
| 6513T>A       | Clone 1         | 1         | 29          | 82.76             | 17.24  |
| 6513T>A       |                 | 2         | 17574       | 76.17             | 21.23  |
| 6513T>A       |                 | 3         | 8259        | 87.17             | 12.35  |
| 6513T>A       | Clone 2         | 1         | 1706        | 89.27             | 10.61  |
| 6513T>A       |                 | 2         | 22415       | 85.87             | 14.13% |
| 6513T>A       |                 | 3         | 22058       | 89.08             | 10.92% |
| 6513T>A       | Patient-derived | 1         | 10914       | 86.45             | 13.55% |
| 6513T>A       |                 | 2         | 16309       | 89.67             | 10.33% |
| 6513T>A       |                 | 3         | 11672       | 88.05             | 11.95% |
| 6619C>T       | Clone 1         | 1         | 17243       | 87.73             | 12.27% |
| 6619C>T       |                 | 2         | 16222       | 87.32             | 12.68% |
| 6619C>T       |                 | 3         | 8174        | 87.61             | 12.38% |

**Figure S1.** Sequencing of *NF1*-mutant hiPSCs. **(A)** Snappgene view of NGS sequencing of all *NF1*-mutant hiPSC clones. (Block only: control; Block/mod: introduced *NF1* gene mutation). **(B-C)** Table and histogram summarizing the percentage of sequence reads detected for the mutant and reference (wild-type) alleles at the mutation site at the genomic level. **(D)** Analysis of reference and mutant (SNP) allele expression in each *NF1*-mutant hiPSC line at the RNA level demonstrates that the wild-type reference allele is over-represented in all *NF1*-mutant hiPSCs relative to the mutation-bearing (SNP) allele. Data are represented as the percentages of reference and mutant reads relative to the total reads.

**Figure S2. Analysis of isogenic hiPSCs, NPCs, and cerebral organoids.**

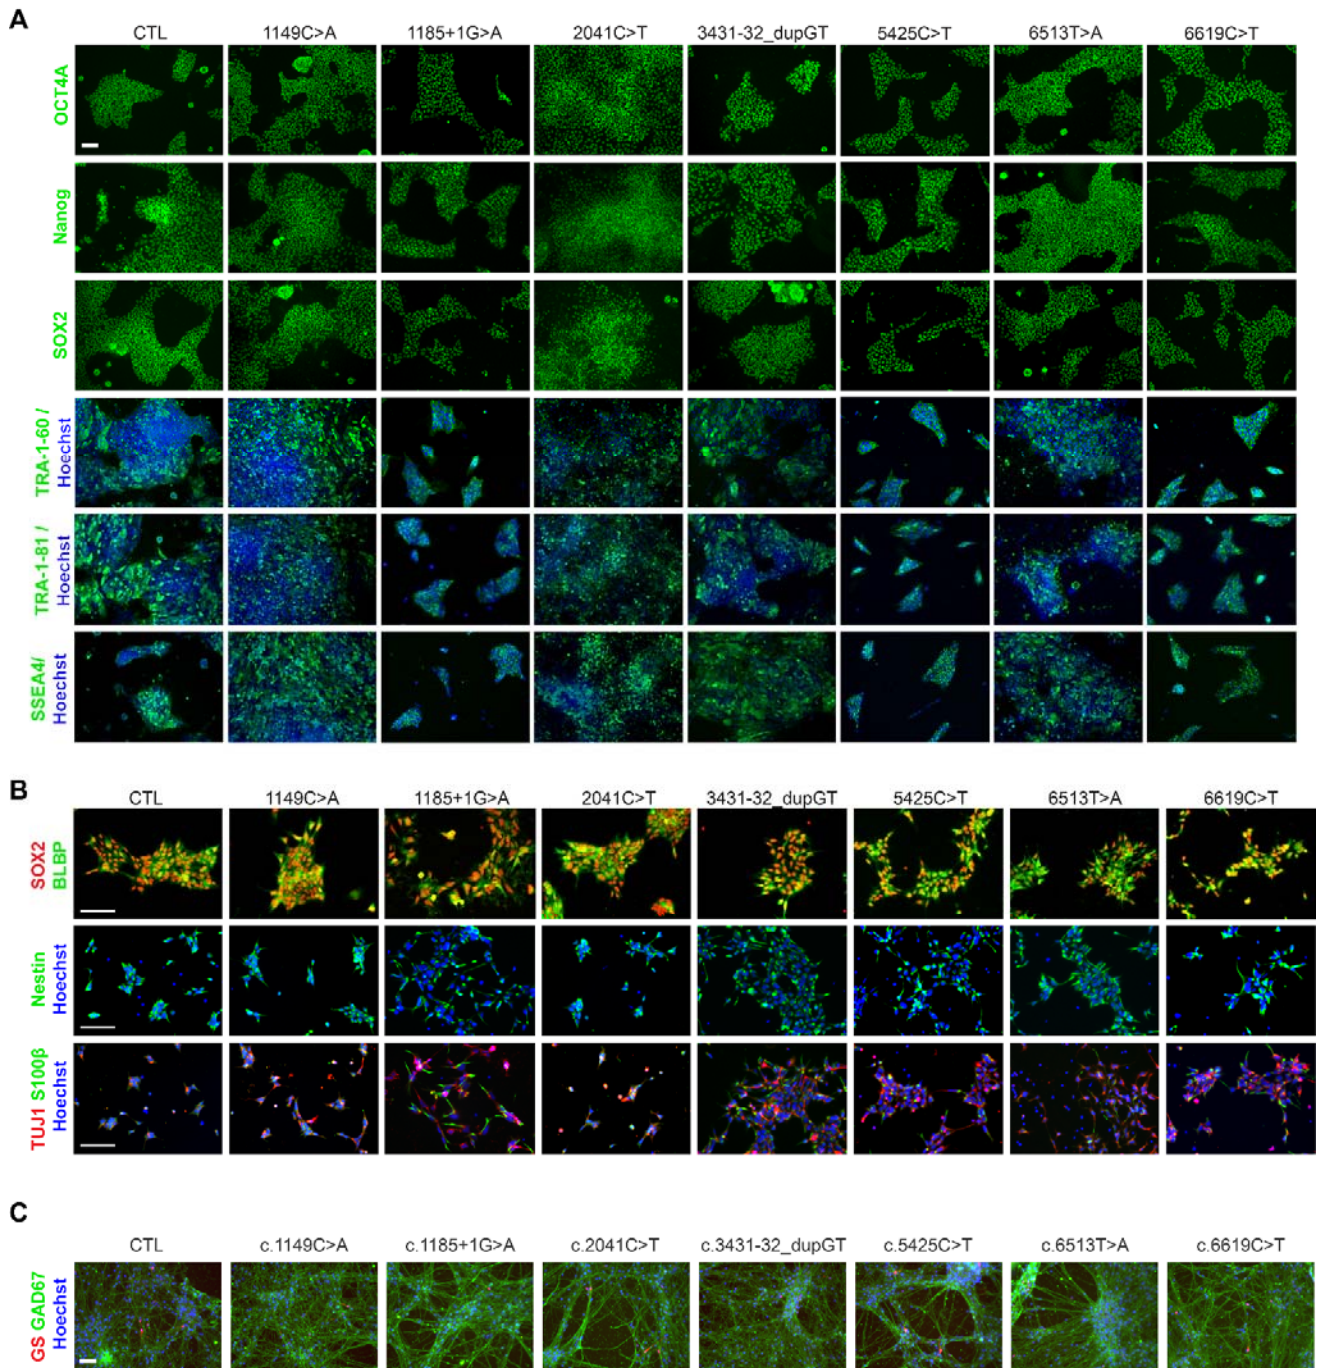

**Figure S2. (A)** Immunofluorescence analysis of all hiPSCs with the NANOG, SOX2, OCT4A, SSEA-4, TRA-1-60, and TRA-1-81 pluripotency markers. Scale bar, 100µm. **(B)** NPCs were

immunopositive for the SOX2, BLBP and Nestin neural stem cell markers (top two panels), and were multipotent, as illustrated by TUJ1<sup>+</sup> and S100 $\beta$ <sup>+</sup> double labeling (bottom panel). Scale bars, 100 $\mu$ m. (C) Control and *NF1*-mutant NPC-differentiated GABAergic neuronal cultures were immunopositive for GAD67 (green) and immunonegative for the excitatory neuron marker glutamate synthetase (GS; red). Scale bar, 100 $\mu$ m.

**Figure S3. Comparisons between isogenic and patient-derived *NF1*-mutant hiPSC-NPCs.**

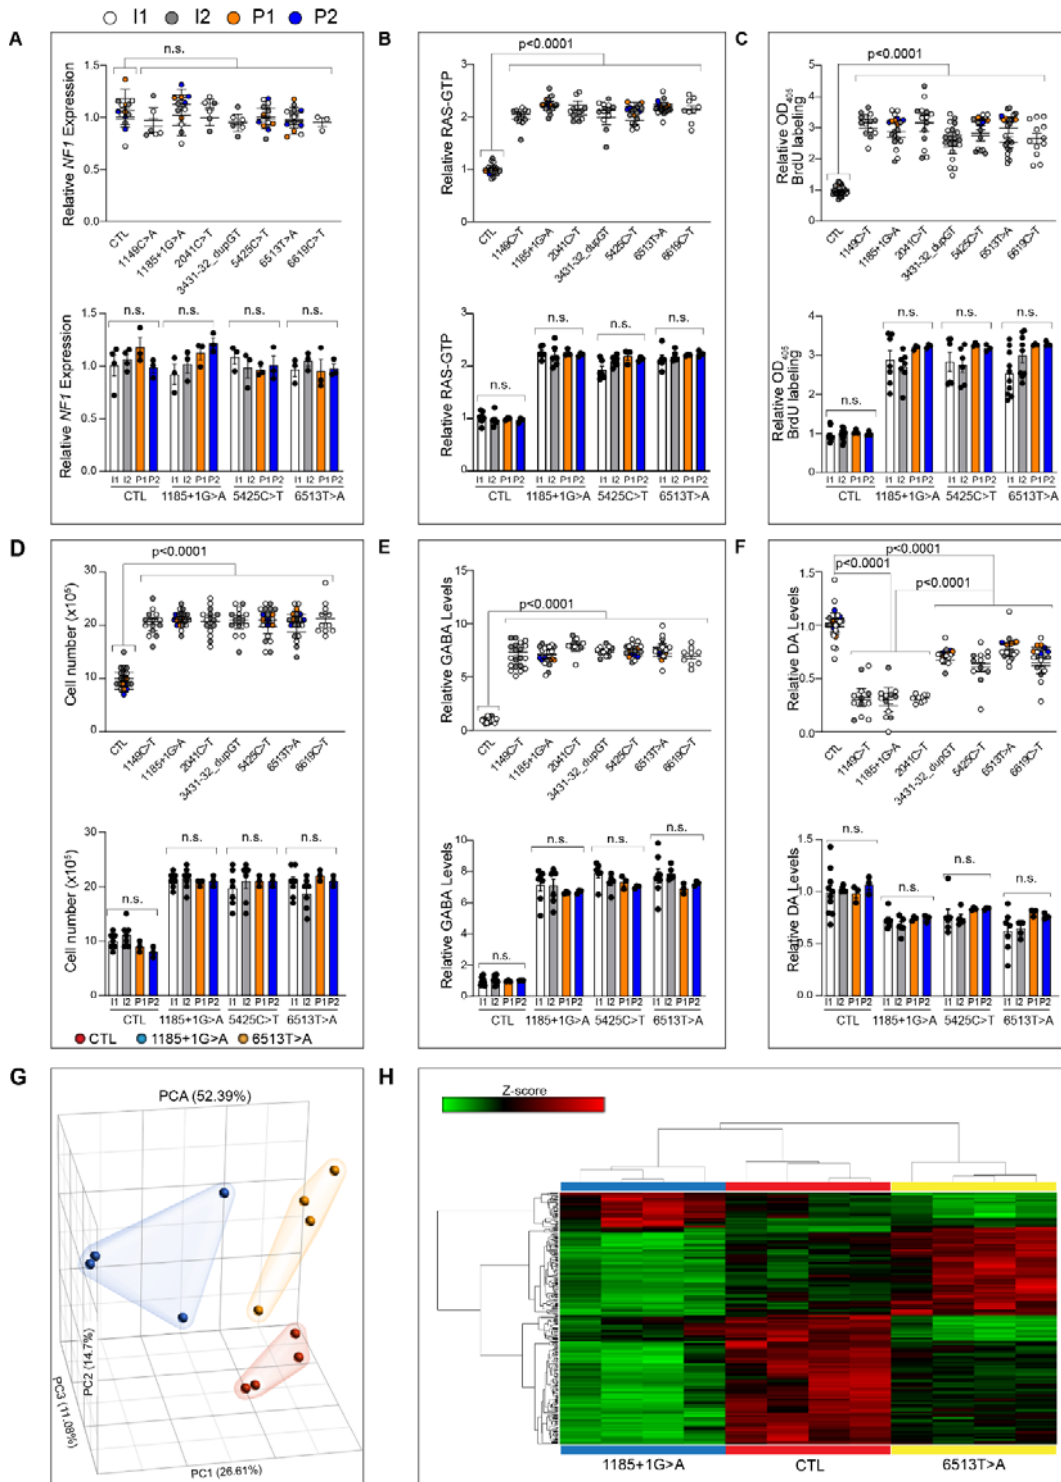

**Figure S3.** (A) Relative *NF1* mRNA expression, (B) RAS activity, (C) BrdU incorporation, and (D) cell numbers are similar between the isogenic and their respective patient-derived NPC lines that harbor the same *NF1* gene mutation. The top panels illustrate all the clones (Isogenic clones: I1, I2; white, grey circles, respectively; Patient-derived clones: P1, P2; orange and blue circles, respectively) employed for each assay, and represent comparisons between all *NF1*-mutant NPCs and controls. The bottom panels illustrate the individual comparisons between the isogenic (I1, I2) and their respective patient-derived (P1, P2) NPCs (CTL; 1185+1G>A; 5425C>T; 6513T>A). Relative (E) GABA levels and (F) DA levels are similar between the isogenic and their respective patient-derived NPC lines harboring the same *NF1* gene mutation. The top panels illustrate all the clones (Isogenic clones: I1, I2; white, grey circles, respectively; Patient-derived clones: P1, P2; orange and blue circles, respectively) employed for each assay, and represent the comparisons between all *NF1*-mutant NPCs and controls. The bottom panels illustrate the individual comparisons between the isogenic (I1, I2) and their respective patient-derived (P1, P2) NPCs (CTL; 1185+1G>A; 5425C>T; 6513T>A). All data are represented as means  $\pm$  SEM; One-way ANOVA with Tukey post-test. ns, not significant. (G) PCA plot and (H) histogram analysis illustrate differential clustering of gene expression between patient-derived and isogenic NPCs harboring two separate *NF1* mutations (1185+1G>A; 6513T>A) or no *NF1* mutation (control; CTL), following next-generation sequencing.



**Figure S4. Comparisons between isogenic and patient-derived *NF1*-mutant hiPSC-organoids.**

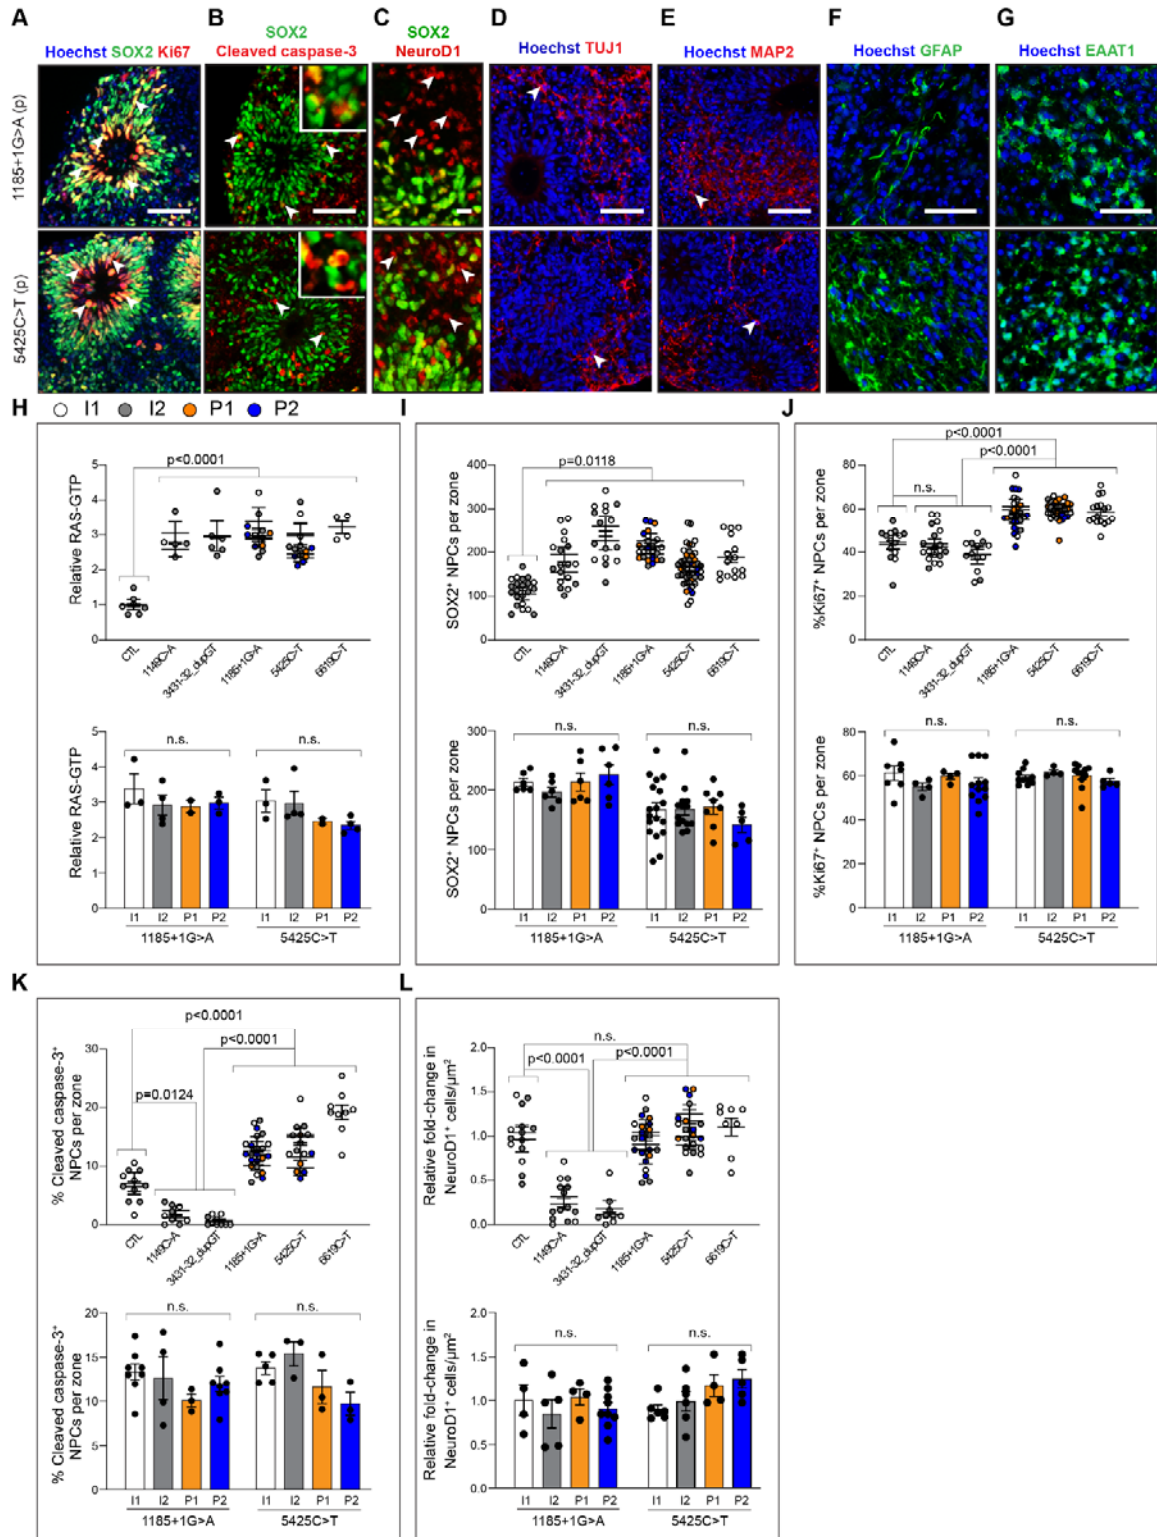

**Figure S4.** Representative images of (A) NPC proliferation (Ki67<sup>+</sup> cells; white arrowheads), (B) NPC apoptosis (cleaved caspase-3; white arrowheads), (C, D) early immature neurons (NeuroD1; TUJ1; white arrowheads), (E) late immature neurons (MAP2; white arrowheads) at 16DIV, and the production of (F) EAAT1<sup>+</sup> glial cells and (G) GFAP<sup>+</sup> fibers at 56DIV in cerebral organoids generated from 1185+1G>A and 5425C>T patient-derived hiPSC lines. Scale bars: (C) 10μm, (A, B, D, E, F, G) 50μm. There were no differences in (H) RAS activity or (I) SOX2<sup>+</sup> NPCs per ventricular zone (VZ) between the isogenic *NF1*-mutant cerebral organoids and their corresponding patient-derived at 16DIV. There were no differences in (J) %Ki67<sup>+</sup> NPCs per VZ, (K) %cleaved caspase-3<sup>+</sup> NPCs per VZ, or (L) NeuroD1<sup>+</sup> immature neurons between the isogenic *NF1*-mutant and their corresponding patient-derived cerebral organoids at 16DIV. The top panels illustrate all the clones (Isogenic clones: I1, I2; white, grey circles, respectively; Patient-derived clones: P1, P2; orange and blue circles, respectively) employed for each assay, and represent the comparisons between all *NF1*-mutant organoids and controls. The bottom panels illustrate the individual comparisons between the isogenic (I1, I2) and their respective patient-derived (P1, P2) NPCs (1185+1G>A; 5425C>T). All data are represented as means ± SEM; One-way ANOVA with Tukey post-test. ns, not significant.

**Table S1. Inter-clone analysis of control and *NF1*-mutant hiPSC-derived cells and organoids.**

|               | NPCs <i>NF1</i> Relative Expression |                                | Isogenic NPCs *   |             |                                | Isogenic Astrocytes *          |                                |                   |                 |                    |
|---------------|-------------------------------------|--------------------------------|-------------------|-------------|--------------------------------|--------------------------------|--------------------------------|-------------------|-----------------|--------------------|
|               | Isogenic *                          | Isogenic vs Patient-derived ** | RAS assays        | BrdU Assays | Direct cell count              | RAS assays                     | BrdU Assays                    | Direct cell count |                 |                    |
| CTL           | 0.598                               | 0.479 / 0.634                  | 0.559             | 0.929       | 0.258                          | 0.317                          | 0.566                          | 0.775             |                 |                    |
| 1149C>T       | 0.153                               | n/a                            | 0.383             | 0.155       | 0.657                          | 0.604                          | 0.395                          | 0.690             |                 |                    |
| 1185+1G>A     | 0.953                               | 0.046 / 0.956                  | 0.564             | 0.552       | 0.758                          | 0.532                          | 0.504                          | 0.563             |                 |                    |
| 2041C>T       | 0.381                               | n/a                            | 0.078             | 0.939       | >0.999                         | 0.847                          | 0.543                          | 0.142             |                 |                    |
| 3431-32_dupGT | 0.570                               | n/a                            | 0.363             | 0.146       | 0.686                          | 0.709                          | 0.426                          | 0.553             |                 |                    |
| 5425C>T       | 0.151                               | 3.380 / 0.104                  | 0.065             | 0.785       | 0.491                          | 0.742                          | 0.458                          | 0.060             |                 |                    |
| 6513T>A       | 0.846                               | 0.941 / 0.441                  | 0.590             | 0.093       | 0.204                          | 0.148                          | 0.096                          | >0.999            |                 |                    |
|               | Isogenic vs Patient-derived NPCs ** |                                |                   | NPCs GABA   |                                | NPCs DA                        |                                |                   |                 |                    |
|               | RAS assays                          | BrdU Assays                    | Direct cell count | Isogenic *  | Isogenic vs Patient-derived ** | Isogenic *                     | Isogenic vs Patient-derived ** |                   |                 |                    |
| CTL           | 0.309 / 0.742                       | 0.593 / 0.573                  | 1.207 / 0.343     | 0.598       | 0.479 / 0.634                  | 0.121                          | 0.925 / 0.431                  |                   |                 |                    |
| 1149C>T       | n/a                                 | n/a                            | n/a               | 0.153       | n/a                            | 0.716                          | n/a                            |                   |                 |                    |
| 1185+1G>A     | 0.372 / 0.704                       | 1.399 / 0.318                  | 2.600 / 0.154     | 0.953       | 0.046 / 0.956                  | 0.371                          | 0.017 / 0.984                  |                   |                 |                    |
| 2041C>T       | n/a                                 | n/a                            | n/a               | 0.381       | n/a                            | 0.963                          | n/a                            |                   |                 |                    |
| 3431-32_dupGT | n/a                                 | n/a                            | n/a               | 0.570       | n/a                            | 0.879                          | n/a                            |                   |                 |                    |
| 5425C>T       | 0.598 / 0.580                       | 1.058 / 0.404                  | 1.000 / 0.422     | 0.151       | 3.380 / 0.104                  | 0.766                          | 0.188 / 0.833                  |                   |                 |                    |
| 6513T>A       | 1.289 / 0.322                       | 3.975 / 0.058                  | 0.500 / 0.622     | 0.846       | 0.941 / 0.441                  | 0.469                          | 0.986 / 0.410                  |                   |                 |                    |
|               | Isogenic Organoids *                |                                |                   |             |                                | Isogenic vs Patient-derived ** |                                |                   |                 |                    |
|               | Ki67*                               | RAS assays                     | NSCs per PZ       | NeuroD1*    | Cleaved Caspase 3*             | Ki67*                          | RAS assays                     | NSCs per PZ       | NeuroD1*        | Cleaved Caspase 3* |
| CTL           | 0.803                               | 0.943                          | 0.367             | 0.651       | 0.603                          | n/a                            | n/a                            | n/a               | n/a             | n/a                |
| 1149C>T       | 0.711                               | 0.354                          | 0.125             | 0.517       | 0.433                          | n/a                            | n/a                            | n/a               | n/a             | n/a                |
| 1185+1G>A     | 0.217                               | 0.383                          | 0.138             | 0.527       | 0.784                          | 0.830/<br>0.491                | 0.561/<br>0.656                | 0.632/<br>0.599   | 0.488/<br>0.695 | 0.838/<br>0.491    |
| 3431-32_dupGT | 0.944                               | 0.951                          | 0.291             | 0.636       | 0.895                          | n/a                            | n/a                            | n/a               | n/a             | n/a                |
| 5425C>T       | 0.216                               | 0.909                          | 0.982             | 0.466       | 0.288                          | 0.780/<br>0.516                | 1.850/<br>0.208                | 0.632/<br>0.599   | 2.675/<br>0.080 | 4.029/<br>0.037    |

**Table S1.** Table detailing the inter-clone analyses of isogenic iPSC-derived NPCs and organoids, as well as isogenic versus patient-derived hiPSC-derived NPCs and organoids harboring the same germline *NF1* mutations. There are no statistically significant differences in the relative *NF1* mRNA expression in NPCs, RAS activity, BrdU incorporation, or cell number in NPCs or astrocytes, GABA and dopamine (DA) levels in NPCs, %Ki67<sup>+</sup> progenitor cells per ventricular zone (VZ), RAS activity, NPCs per ventricular zone (VZ), NeuroD1<sup>+</sup> cells or %cleaved caspase-3<sup>+</sup> progenitor cells per VZ in cerebral organoids. \*t-test; P-values reported, \*\*One-Way ANOVA; F / P-values reported, respectively. n/a: not applicable.

**Table S2. Primary antibodies used.**

| <b>Antibody</b>   | <b>Vendor</b>     | <b>Catalog No</b> | <b>Host</b> | <b>Application (dilution)</b> |
|-------------------|-------------------|-------------------|-------------|-------------------------------|
| BLBP              | Millipore         | ABN14             | Rabbit      | ICC (1:200)                   |
| Cleaved caspase-3 | Cell Signaling    | 9664              | Rabbit      | IF (1:250)                    |
| EAAT1             | Abcam             | ab416             | Rabbit      | ICC, IF (1:500)               |
| EAAT2             | Abcam             | ab41621           | Rabbit      | ICC (1:500)                   |
| GFAP              | Abcam             | ab4648            | Mouse       | ICC, IF (1:500)               |
| Ki67              | Fisher Scientific | BDB556003         | Mouse       | IF (1:100)                    |
| MAP2              | Abcam             | ab11267           | Mouse       | IF (1:500)                    |
| Nanog (D73G4)     | Cell Signaling    | 9656S             | Rabbit      | ICC (1:200)                   |
| Nestin            | Abcam             | ab92391           | Rabbit      | ICC (1:250)                   |
| NeuroD1           | Abcam             | ab60704           | Mouse       | IF (1:500)                    |
| Oct-4A (C30A3)    | Cell Signaling    | 9656S             | Rabbit      | ICC (1:200)                   |
| S100 $\beta$      | Abcam             | ab41548           | Rabbit      | ICC (1:200)                   |
| SOX2              | Cell Signaling    | 4900S             | Mouse       | ICC (1:1000); IF (1:250)      |
| Sox2 (D6D9)       | Cell Signaling    | 9656S             | Rabbit      | ICC (1:200)                   |
| SOX2              | Abcam             | ab92494           | Rabbit      | IF (1:250)                    |
| SSEA4 (MC813)     | Cell Signaling    | 9656S             | Mouse       | ICC (1:200)                   |
| TRA-1-60(S)       | Cell Signaling    | 9656S             | Mouse       | ICC (1:200)                   |
| TRA-1-81          | Cell Signaling    | 9656S             | Mouse       | ICC (1:200)                   |
| TUJ-1             | Abcam             | ab78078           | Mouse       | ICC (1:1000)                  |

## Supplemental Methods

*Next Generation RNA Sequencing and Analysis.* RNA was extracted from three independently-generated samples of isogenic CTL or *NF1*-mutant (1185+1G>A; 6513T>A) NPCs, and one sample each from the non-isogenic CTL and patient-derived *NF1*-mutant NPCs harboring the same *NF1* mutations. Samples were prepared according to library kit manufacturer's protocol, indexed, pooled, and sequenced on an Illumina HiSeq. Basecalls and demultiplexing were performed with Illumina's bcl2fastq software and a custom python demultiplexing program with a maximum of one mismatch in the indexing read. RNA-seq reads were then aligned to the Ensembl release 76 primary assembly with STAR version 2.5.1a. Gene counts were derived from the number of uniquely aligned unambiguous reads by Subread:featureCount version 1.4.6-p5. Isoform expressions of known Ensembl transcripts were estimated with Salmon version 0.8.2. Sequencing performance was assessed for the total number of aligned reads, total number of uniquely aligned reads, and features detected. The ribosomal fraction, known junction saturation, and read distribution over known gene models were quantified with RSeQC version 2.6.2. The raw gene count matrix was then imported into Partek Flow software, version 8.0. Normalization size factors were calculated for all gene counts by CPM to adjust for differences in sequencing depth. Ribosomal genes and genes not expressed in the smallest group size minus samples greater than one count-per-million were excluded from further analysis. Gene-specific analysis was then performed using the lognormal with shrinkage model (limma-trend method) to analyze for differential expression between the three groups of samples. Principle component analysis (PCA) was conducted in Partek Flow using normalized gene counts. The "grouping" is simply a post hoc highlighting of the genotypes for assistance in visualizing that the different samples clustered together by genotype during the principle component. For further visualization, a heatmap was generated using the differential genes for each group filtered at p-values  $\leq 0.05$  and log fold-changes more extreme or equal to  $\pm 2$ .

Features and samples were clustered using Pearson Correlation as a distance metric. Deep sequencing data has been submitted to GEO with accession number GSE144601.

*Allele-Specific Analysis Primers Used.* The primers used for the first PCR reaction including the Illumina adaptor sequences were the following:

1149C>A FW: GTGACTGGAGTTCAGACGTGTGCTCTTCCGATCTCTACTTGTTTCAGTCCATGGTGG

1149C>A REV: ACACTCTTTCCCTACACGACGCTCTTCCGATCTCCAATGCGGAATTGGTGATGA

2041C>T FW: GTGACTGGAGTTCAGACGTGTGCTCTTCCGATCTAATTACTACGTA CTCTGGAGC

2041C>T REV: ACACTCTTTCCCTACACGACGCTCTTCCGATCTGCAAGAGGTTATGCACTGAC

3431-32\_dupGT FW: GTGACTGGAGTTCAGACGTGTGCTCTTCCGATCTGACTGCAGTGAAGTTGA  
AGATG

3431-32\_dupGT REV: ACACTCTTTCCCTACACGACGCTCTTCCGATCTGTAGCTCTTGTCTGGAGAT  
CC

5425C>T FW: GTGACTGGAGTTCAGACGTGTGCTCTTCCGATCTGAAGCCATTGTCCAGTCTATC

5425C>T REV: ACACTCTTTCCCTACACGACGCTCTTCCGATCTGGTACAAGTTAAGGCACACAG

6513T>A FW: GTGACTGGAGTTCAGACGTGTGCTCTTCCGATCTGACTCAGTCTGACAGAGTTCTC

6513T>A REV: ACACTCTTTCCCTACACGACGCTCTTCCGATCTCTAGTTCTGTCCACTGGTCC

6619C>T FW: GTGACTGGAGTTCAGACGTGTGCTCTTCCGATCTTGCCTTCCGTTCCAGTTACC

6619C>T REV: ACACTCTTTCCCTACACGACGCTCTTCCGATCTGAGCTCTTGGTTGCAGGGAT

The primers used for the second amplification PCR reaction which include the unique indexes employed to identify different sequencing products were the following:

Primer 1.0 FW: AATGATACGGCGACCACCGAGATCTACACACTCTTTCCCTACACGACGCTCTTC  
CGATCT

Primer 1.0 SIC2 FW: AATGATACGGCGACCACCGAGATCTACACAATGAAACTCTTTCCCTACA  
CGACGCTCTTCCGATCT

Common REV: GTGACTGGAGTTCAGACGTGTGCTCTTCCGATCT

Index 1 REV: CAAGCAGAAGACGGCATAACGAGATAAATAGATGGTACTGGAGTTC

Index 2 REV: CAAGCAGAAGACGGCATAACGAGATCAGAGGAGAGTGACTGGAGTTC

Index 3 REV: CAAGCAGAAGACGGCATAACGAGATCGTATAGATGTGACTGGAGTTC

Index 4 REV: CAAGCAGAAGACGGCATAACGAGATAAGGGCTCAGTGACTGGAGTTC
